# Supplementary material for: Design of polysulfobetaine derivatives for enhanced inhibition of protein aggregation
Source: Royal Society of Chemistry journal article supplement (doi:10.1039/d4py00129j), 2024-01-01
Supplement: d4py00129j1.pdf [file d4py00129j1.pdf]

## **Design of Polysulfobetaine Derivatives for Enhanced Inhibition of Protein Aggregation**

Robin Rajan<sup>\*a</sup> and Kazuaki Matsumura<sup>\*a</sup>

<sup>a</sup>School of Materials Science, Japan Advanced Institute of Science and Technology, 1-1 Asahidai, Nomi, Ishikawa 923-1292, Japan

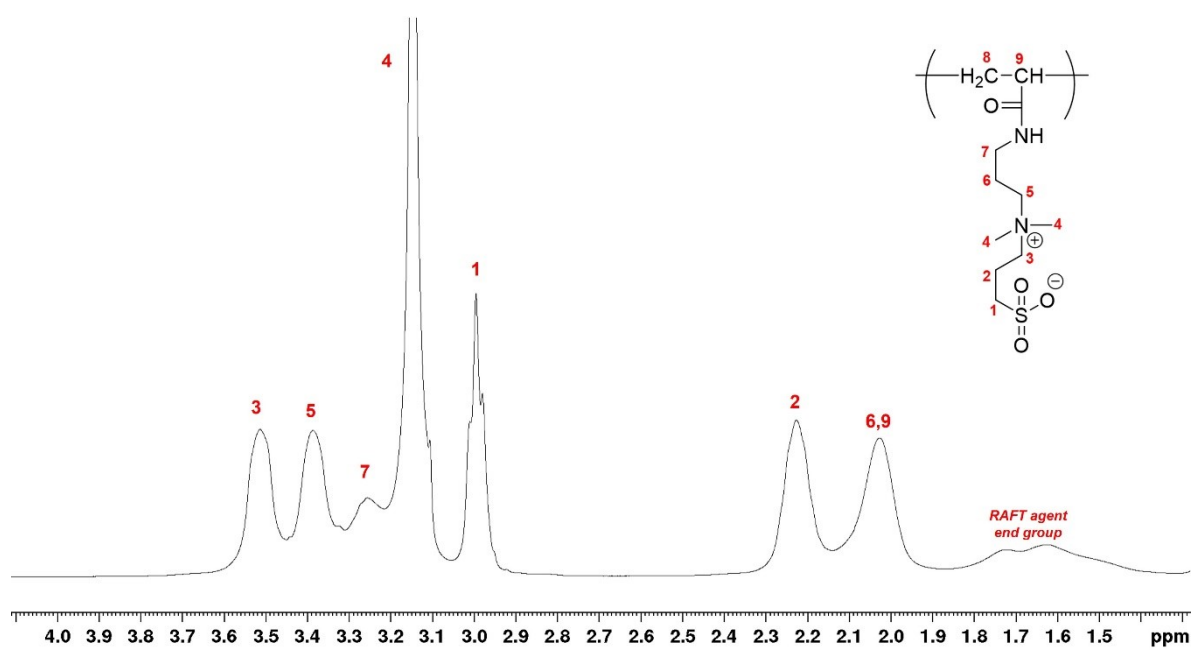

**Fig. S1** <sup>1</sup>H NMR spectrum of polysulfobetaine in D<sub>2</sub>O.

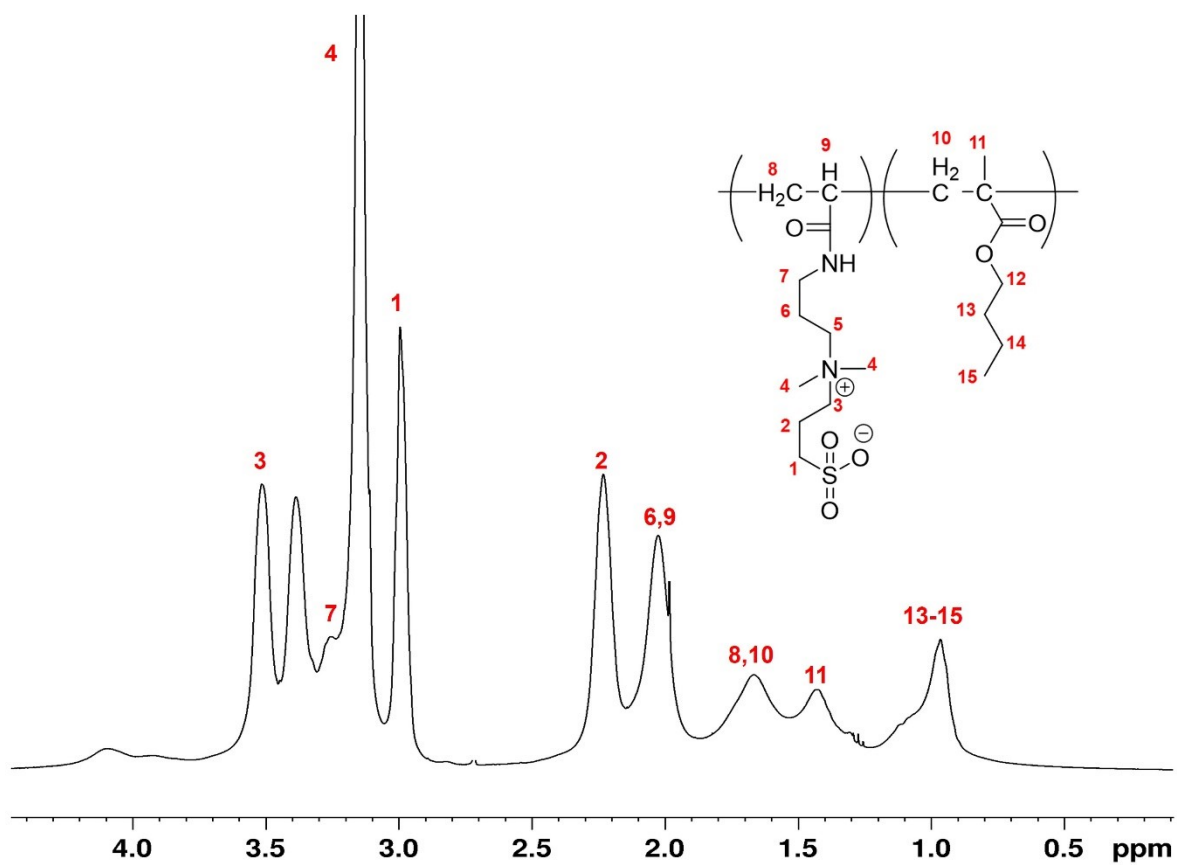

**Fig. S2**  $^1\text{H}$  NMR spectrum of P(SPB-*r*-BuMA) in  $\text{D}_2\text{O}$ .

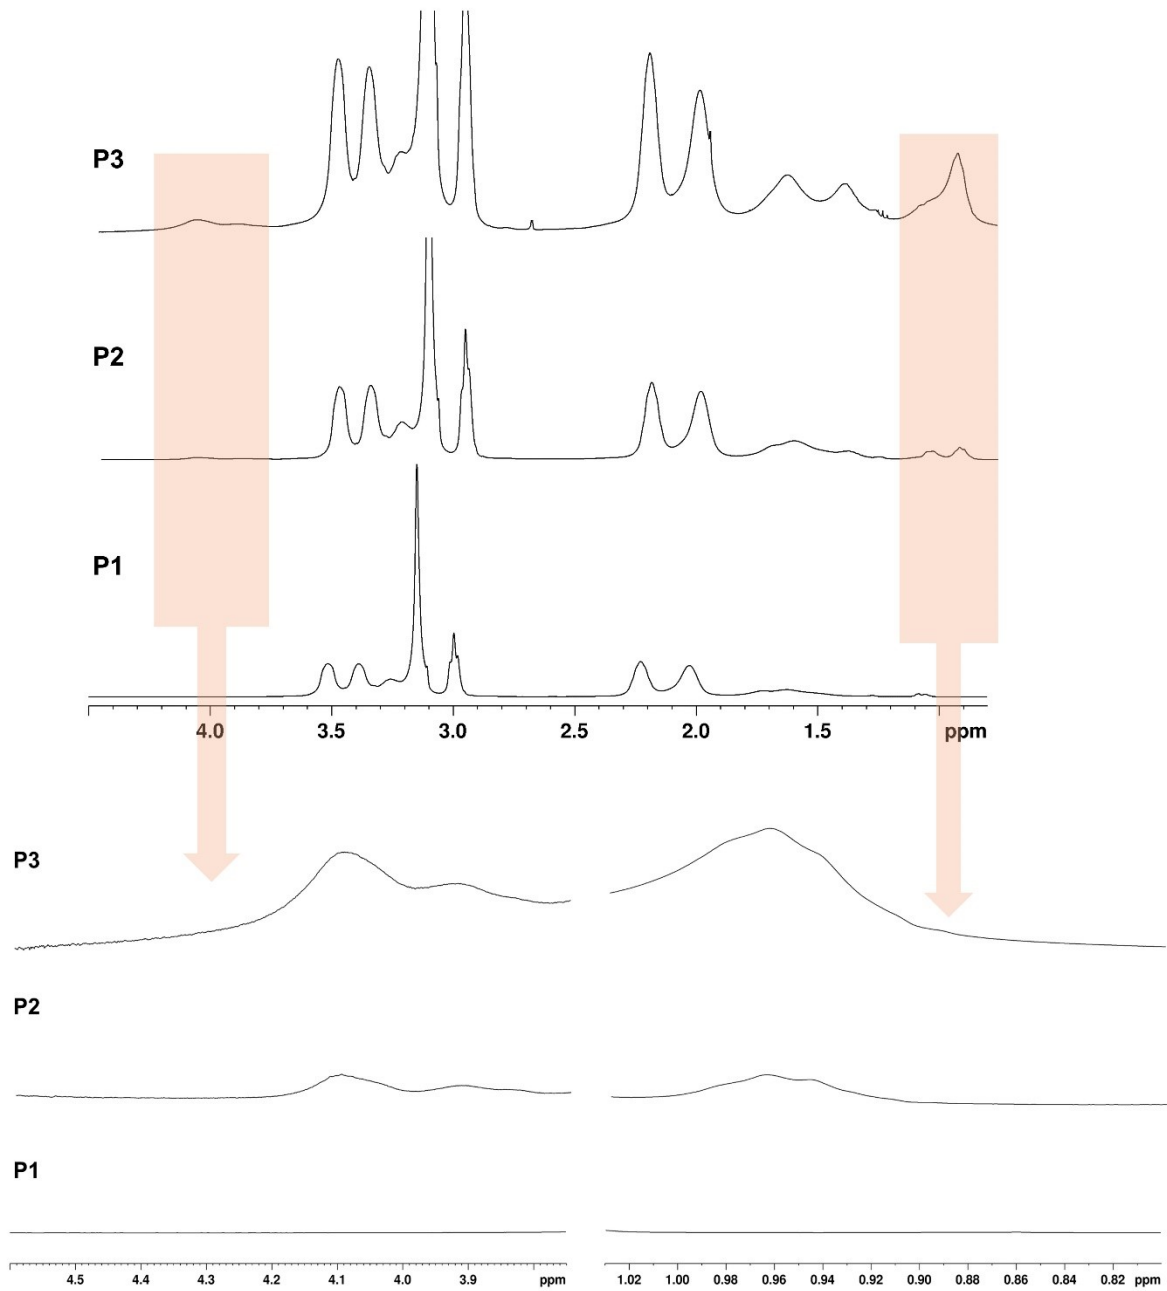

**Fig. S3** Comparison of P1, P2, and P3 by  $^1\text{H}$  NMR spectroscopy in  $\text{D}_2\text{O}$ .

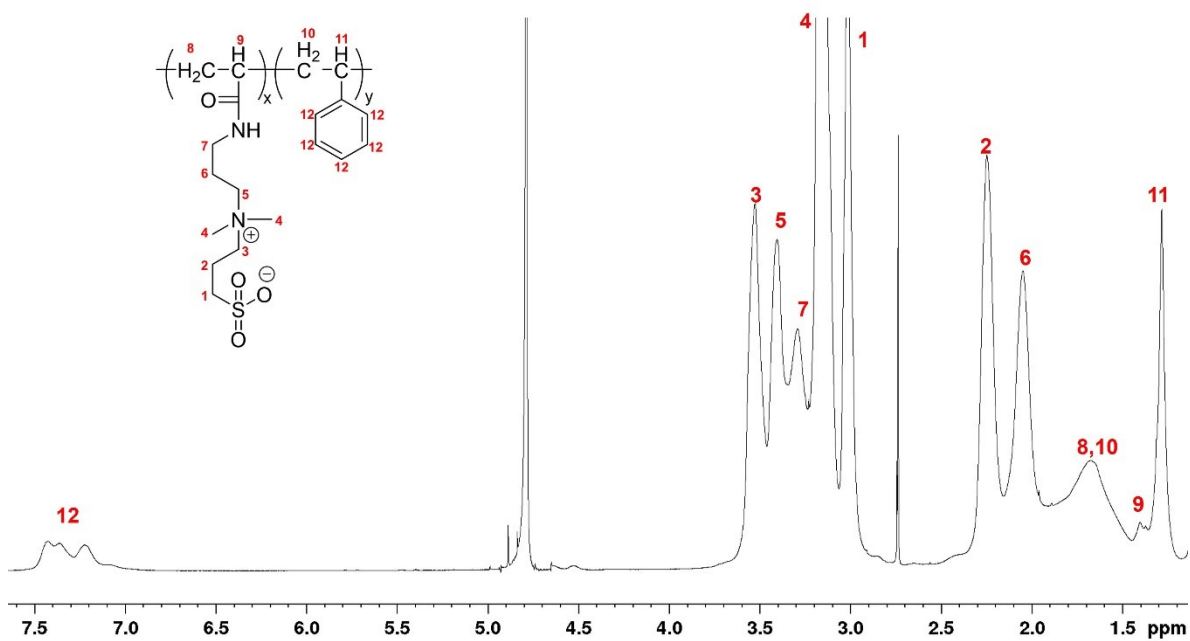

**Fig. S4** <sup>1</sup>H NMR spectrum of P(SPB-*r*-St) in D<sub>2</sub>O.

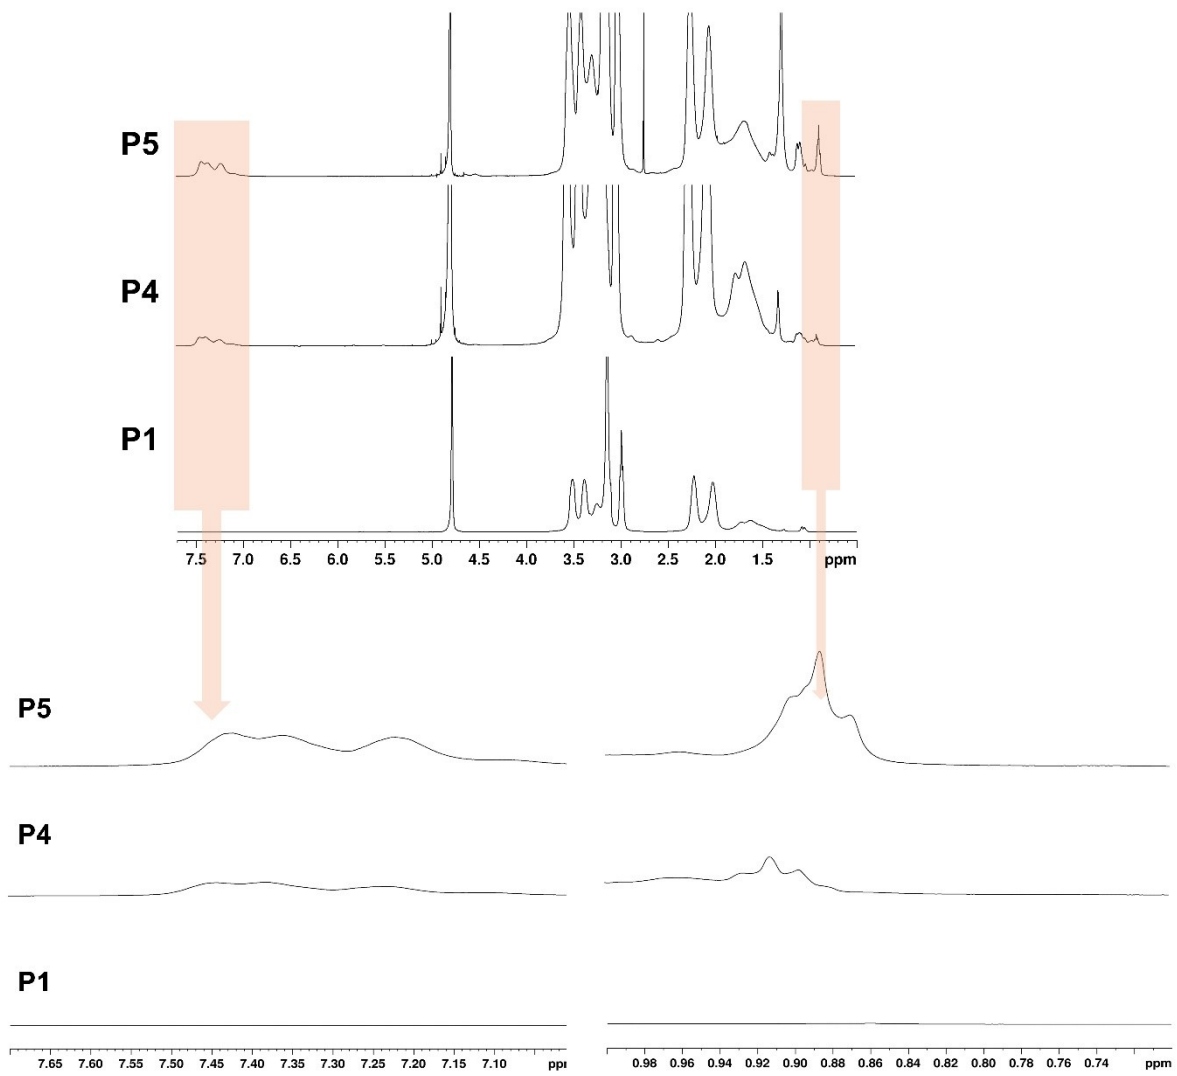

**Fig. S5** Comparison of P1, P4, and P5 by  $^1\text{H}$  NMR spectroscopy in  $\text{D}_2\text{O}$ .

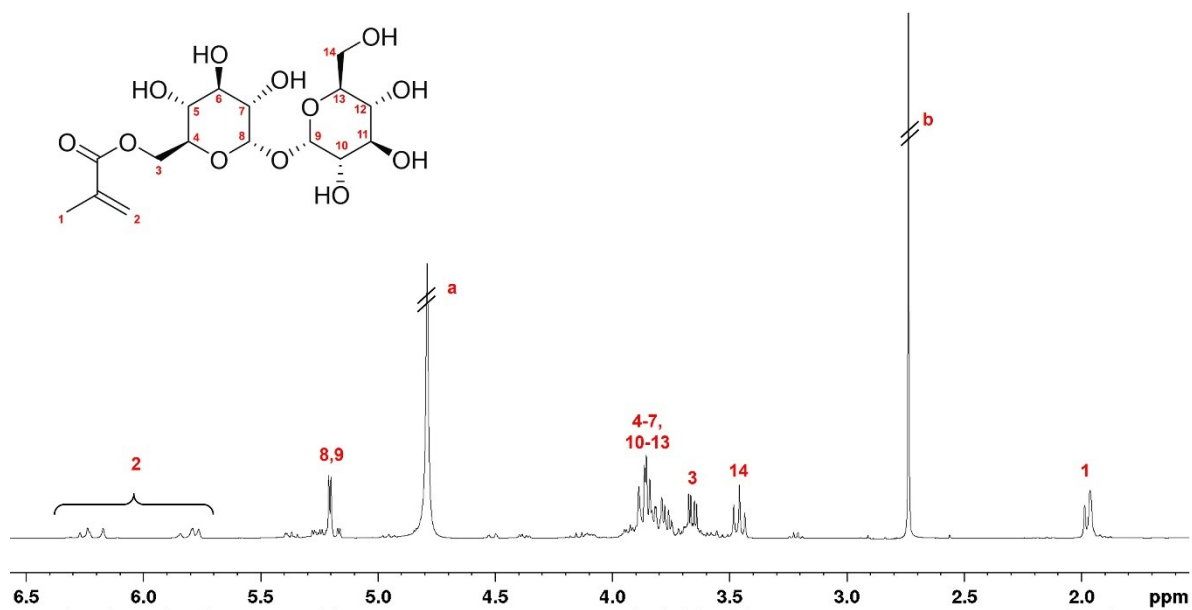

**Fig. S6** <sup>1</sup>H NMR spectrum of trehalose methacrylate in D<sub>2</sub>O. The peaks marked with lines represent the residual solvent peaks, with a and b corresponding to water and dimethylsulfoxide, respectively.

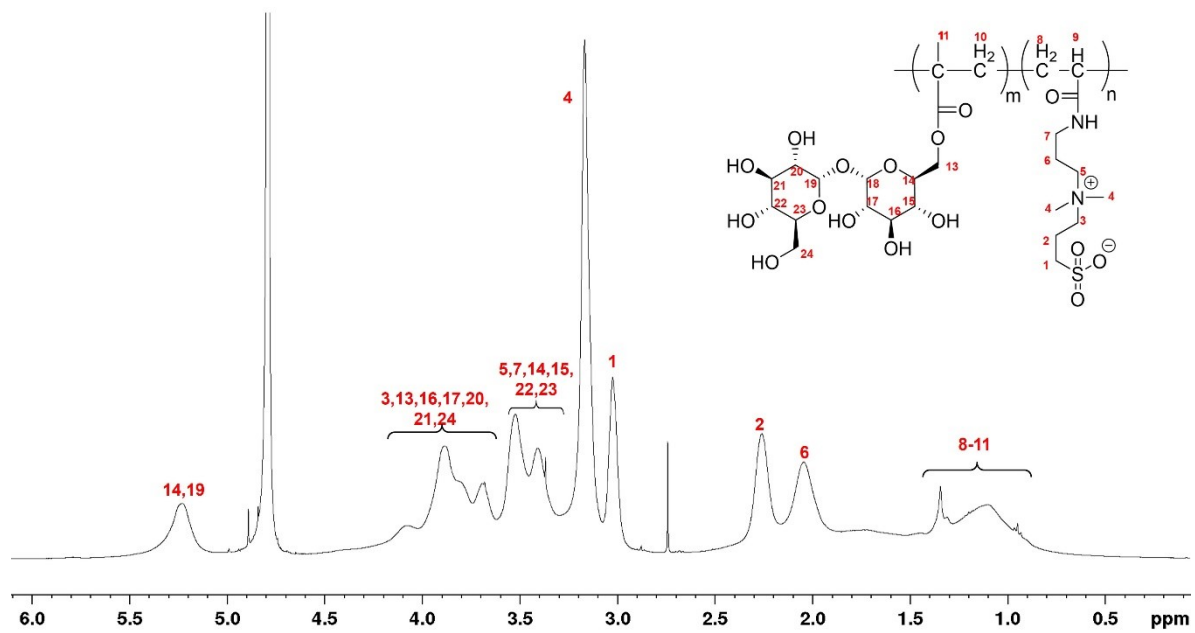

**Fig. S7** <sup>1</sup>H NMR spectrum of P(SPB-*r*-TrMA) in D<sub>2</sub>O.



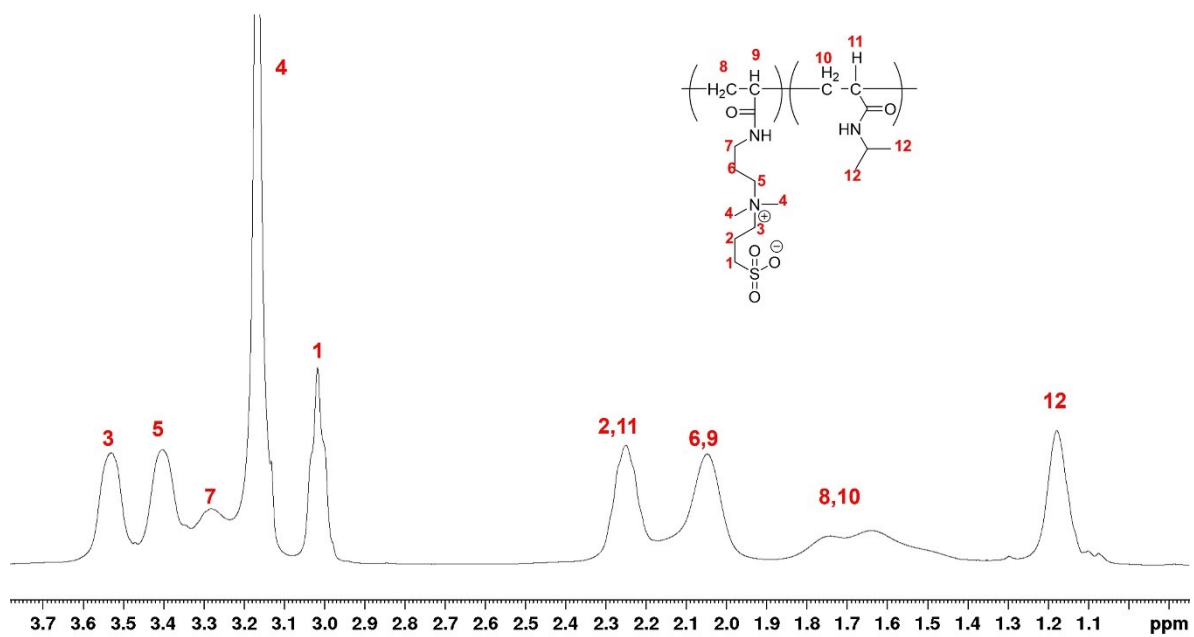

**Fig. S8** <sup>1</sup>H NMR spectrum of P(SPB-*r*-NTBAm) in D<sub>2</sub>O.

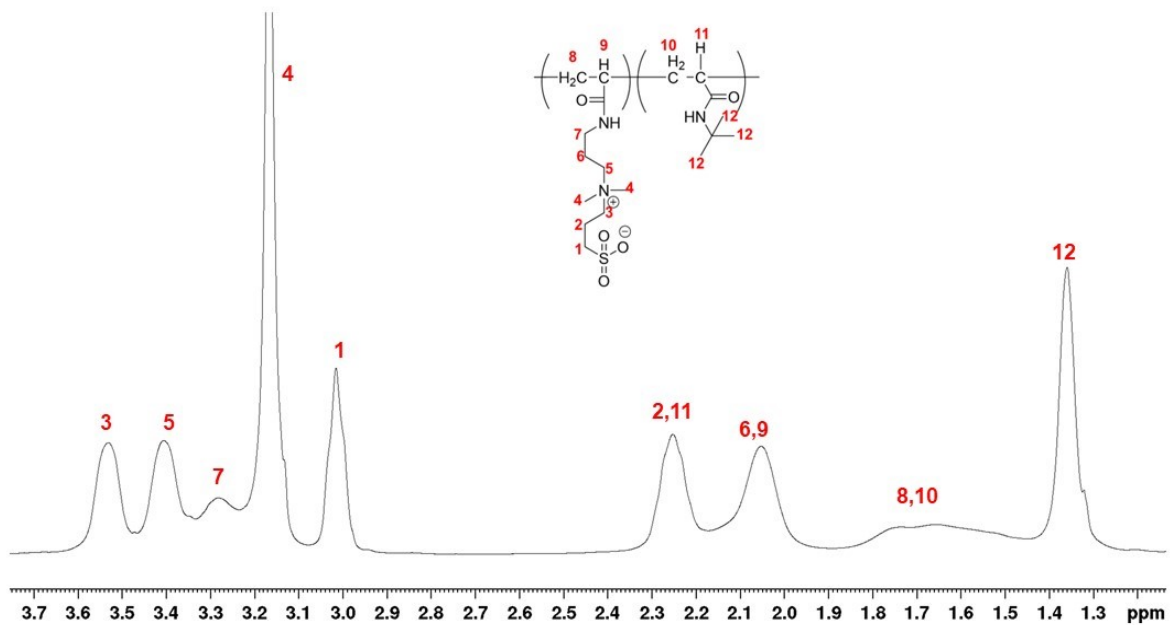

**Fig. S9** <sup>1</sup>H NMR spectrum of P(SPB-*r*-NIPAm) in D<sub>2</sub>O.

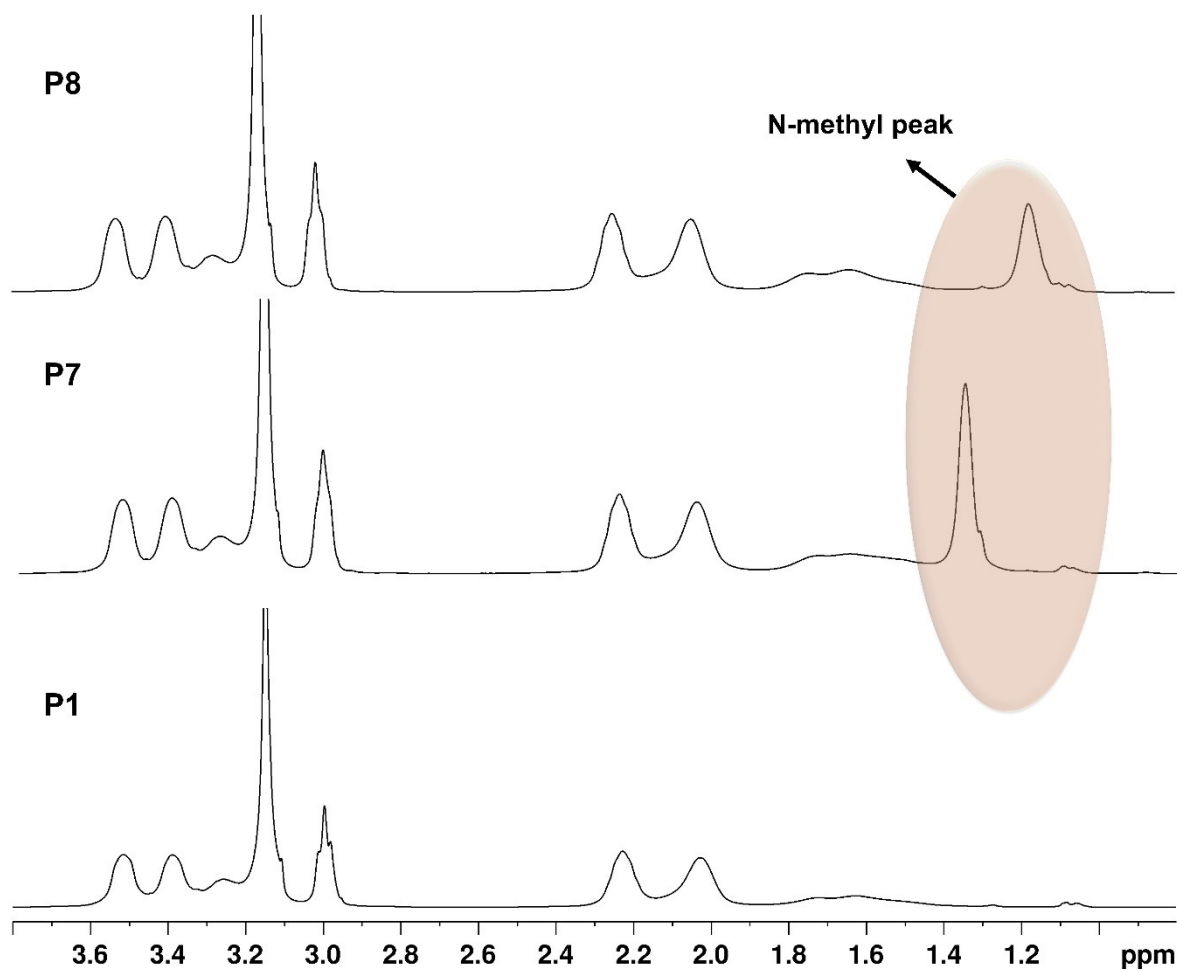

**Fig. S10** Comparison of P1, P7, and P8 by  $^1\text{H}$  NMR spectroscopy in  $\text{D}_2\text{O}$ .

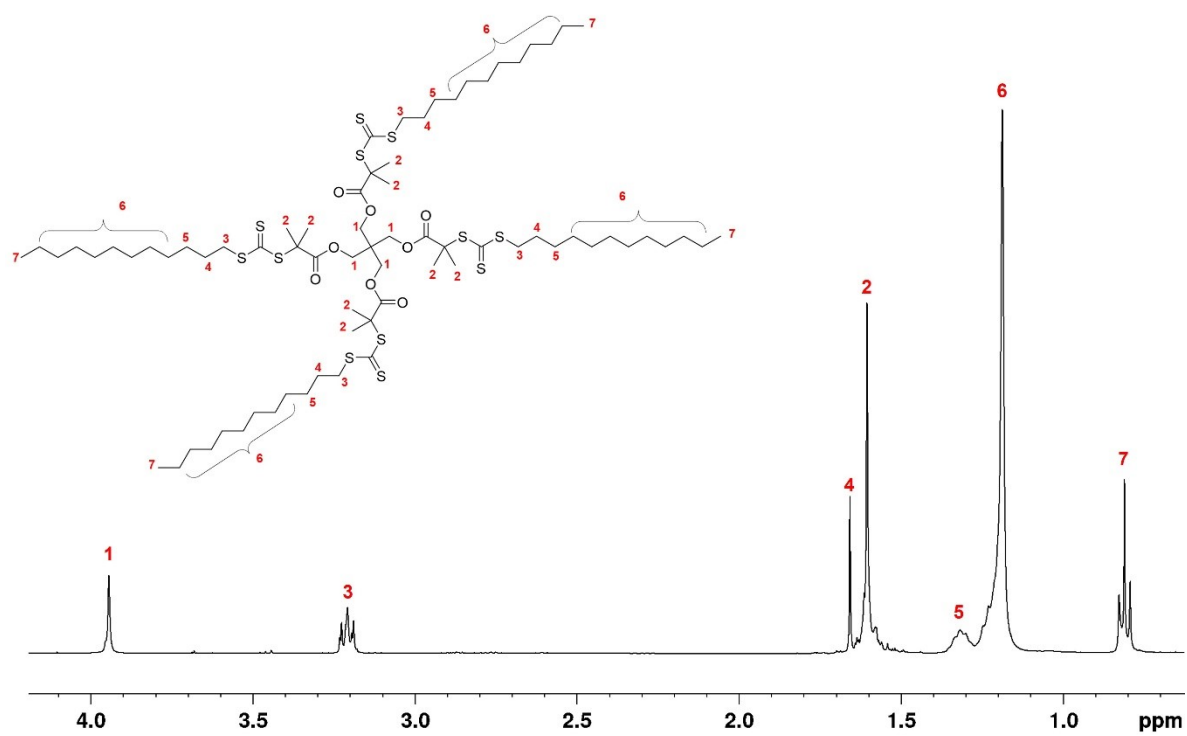

**Fig. S11** <sup>1</sup>H NMR spectrum of four-armed reversible addition–fragmentation chain transfer agent in CDCl<sub>3</sub>.
